# Supplementary material for: Microbial Oxidation of the Fusidic Acid Side Chain by Cunninghamella echinulata
Source: MDPI journal article supplement (doi:10.3390/molecules23040970), 2018-04-21
Supplement: s1 [file s1]

## Supplementary Data

### Microbial oxidation of the fusidic acid side chain by *Cunninghamella echinulata*

Abdel-Rahim S. Ibrahim <sup>1</sup>, Khaled M. Elokely <sup>2,3</sup>, Daneel Ferreira <sup>4</sup> and Amany E. Ragab <sup>1,\*</sup>

<sup>1</sup> Department of Pharmacognosy, Faculty of Pharmacy, Tanta University, Tanta; 31527, Egypt; [arsib16@hotmail.com](mailto:arsib16@hotmail.com)

<sup>2</sup> Department of Pharmaceutical Chemistry, Faculty of Pharmacy, Tanta University, Tanta; 31527, Egypt; [kelokely@pharm.tanta.edu.eg](mailto:kelokely@pharm.tanta.edu.eg)

<sup>3</sup> Institute for Computational Molecular Science and Department of Chemistry, Temple University, Philadelphia; PA 19122, United States; [kelokely@temple.edu](mailto:kelokely@temple.edu)

<sup>4</sup> Department of BioMolecular Sciences, Division of Pharmacognosy, School of Pharmacy, The University of Mississippi, University, MS 38677-1848, United States; [dferreir@olemiss.edu](mailto:dferreir@olemiss.edu)

\* Correspondence: [amany.ragab@pharm.tanta.edu.eg](mailto:amany.ragab@pharm.tanta.edu.eg) ; Tel.: +20-40-333-6007-EXT 266

| <b>Contents</b>                                                                                       | <b>Page Number</b> |
|-------------------------------------------------------------------------------------------------------|--------------------|
| <sup>1</sup> H and <sup>13</sup> C NMR spectra of (24 <i>E</i> )- 27-hydroxyfusidic acid ( <b>2</b> ) | S3                 |
| DEPT 135 spectrum of (24 <i>E</i> )- 27-hydroxyfusidic acid ( <b>2</b> )                              | S4                 |
| <sup>1</sup> H- <sup>1</sup> H COSY spectrum of fusidic acid ( <b>1</b> )                             | S5                 |
| <sup>1</sup> H- <sup>1</sup> H COSY spectrum of (24 <i>E</i> )- 27-hydroxyfusidic acid ( <b>2</b> )   | S6                 |
| HMBC spectrum of (24 <i>E</i> )- 27-hydroxyfusidic acid ( <b>2</b> )                                  | S7                 |
| HRESI-MS spectrum of (24 <i>E</i> )- 27-hydroxyfusidic acid ( <b>2</b> )                              | S8                 |
| <sup>1</sup> H and <sup>13</sup> C NMR spectra of (24 <i>Z</i> )- 26-hydroxyfusidic acid ( <b>3</b> ) | S9                 |
| DEPT 135 spectrum of (24 <i>Z</i> )- 26-hydroxyfusidic acid ( <b>3</b> )                              | S10                |
| <sup>1</sup> H- <sup>1</sup> H COSY spectrum of (24 <i>Z</i> )- 26-hydroxyfusidic acid ( <b>3</b> )   | S11                |
| HMQC spectrum of (24 <i>Z</i> )- 26-hydroxyfusidic acid ( <b>3</b> )                                  | S12                |
| HRESI-MS spectrum of (24 <i>Z</i> )- 26-hydroxyfusidic acid ( <b>3</b> )                              | S13                |
| <sup>1</sup> H and <sup>13</sup> C NMR spectra of 26-formylfusidic acid ( <b>4</b> )                  | S14                |
| DEPT 90 spectrum of 26-formylfusidic acid ( <b>4</b> )                                                | S15                |
| <sup>1</sup> H- <sup>1</sup> H COSY spectrum of 26-formylfusidic acid ( <b>4</b> )                    | S16                |
| HMBC spectrum of 26-formylfusidic acid ( <b>4</b> )                                                   | S17                |
| HRESI-MS spectrum of 26-formylfusidic acid ( <b>4</b> )                                               | S18                |
| <sup>1</sup> H and <sup>13</sup> C NMR spectra of 26-carboxyfusidic acid ( <b>5</b> )                 | S19                |
| DEPT 90 and 135 spectra of 26-carboxyfusidic acid ( <b>5</b> )                                        | S20                |
| <sup>1</sup> H- <sup>1</sup> H COSY spectrum of 26-carboxyfusidic acid ( <b>5</b> )                   | S21                |
| HMBC spectrum of 26-carboxyfusidic acid ( <b>5</b> )                                                  | S22                |
| HRESI-MS spectrum of 26-carboxyfusidic acid ( <b>5</b> )                                              | S23                |
| A list of screened strains                                                                            | S24                |



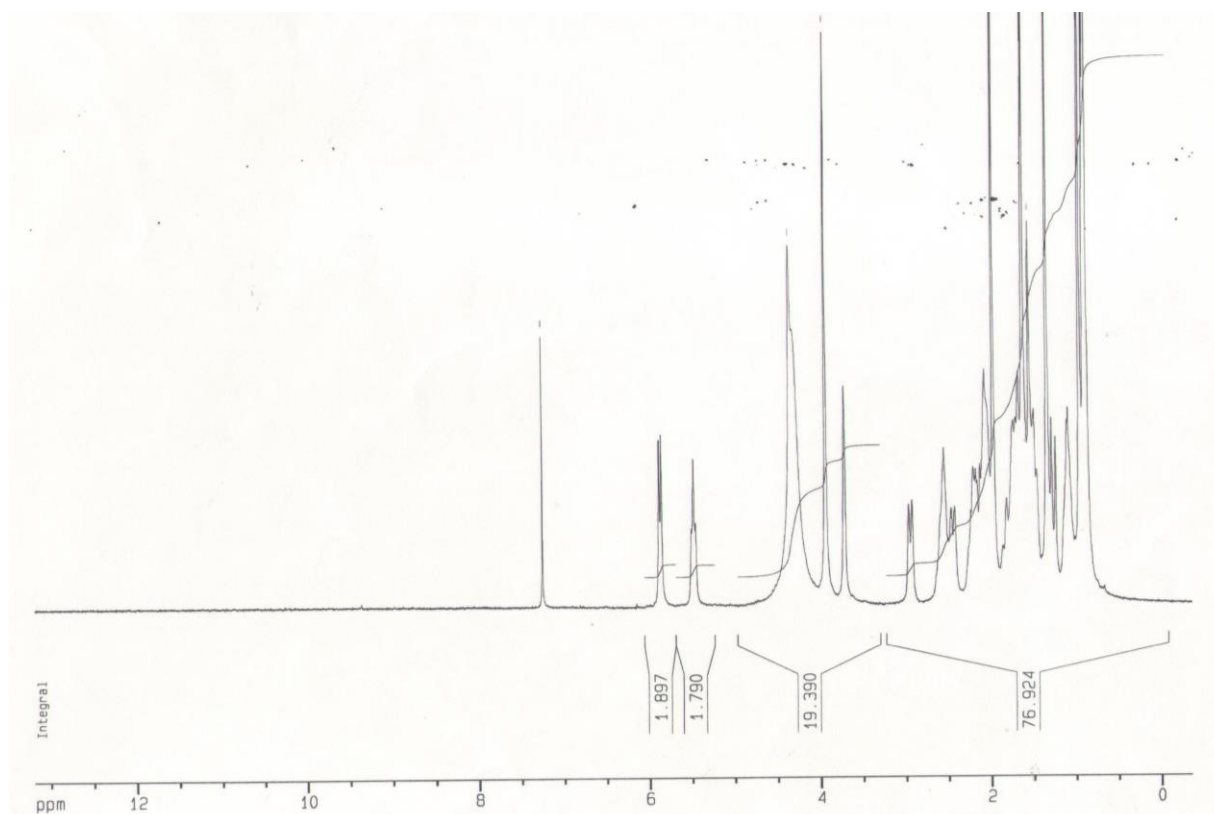

**Figure S1.**  $^1\text{H}$  NMR spectrum of (24*E*)- 27-hydroxyfusidic acid (**2**), ( $\text{CDCl}_3$ , 300 MHz)

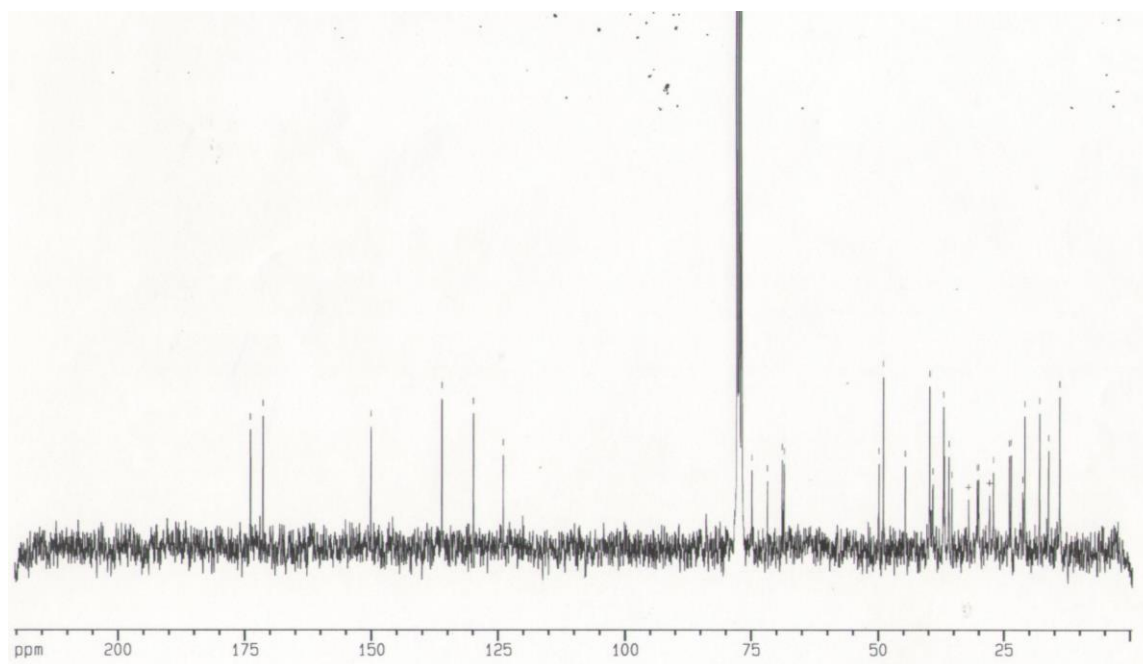

**Figure S2.**  $^{13}\text{C}$  NMR spectrum of (24*E*)- 27-hydroxyfusidic acid (**2**), ( $\text{CDCl}_3$ , 75 MHz)

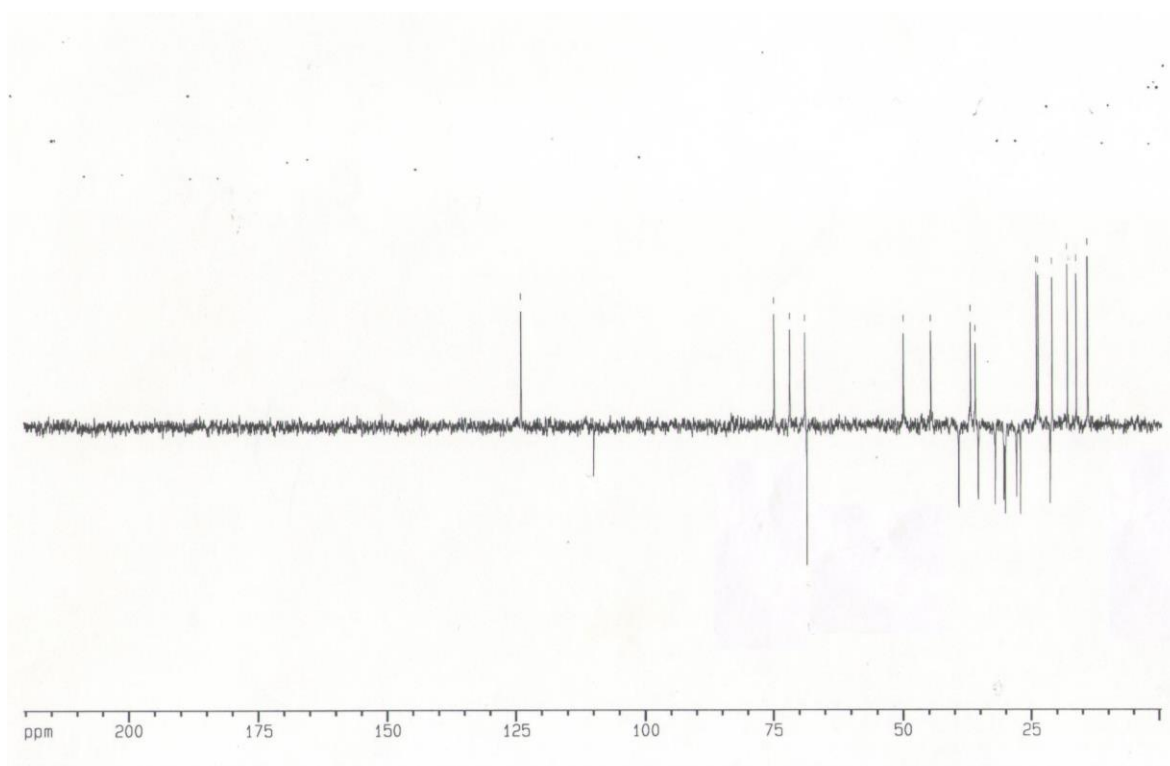

**Figure S3.** DEPT 135 spectrum of (*24E*)- 27-hydroxyfusidic acid (**2**)

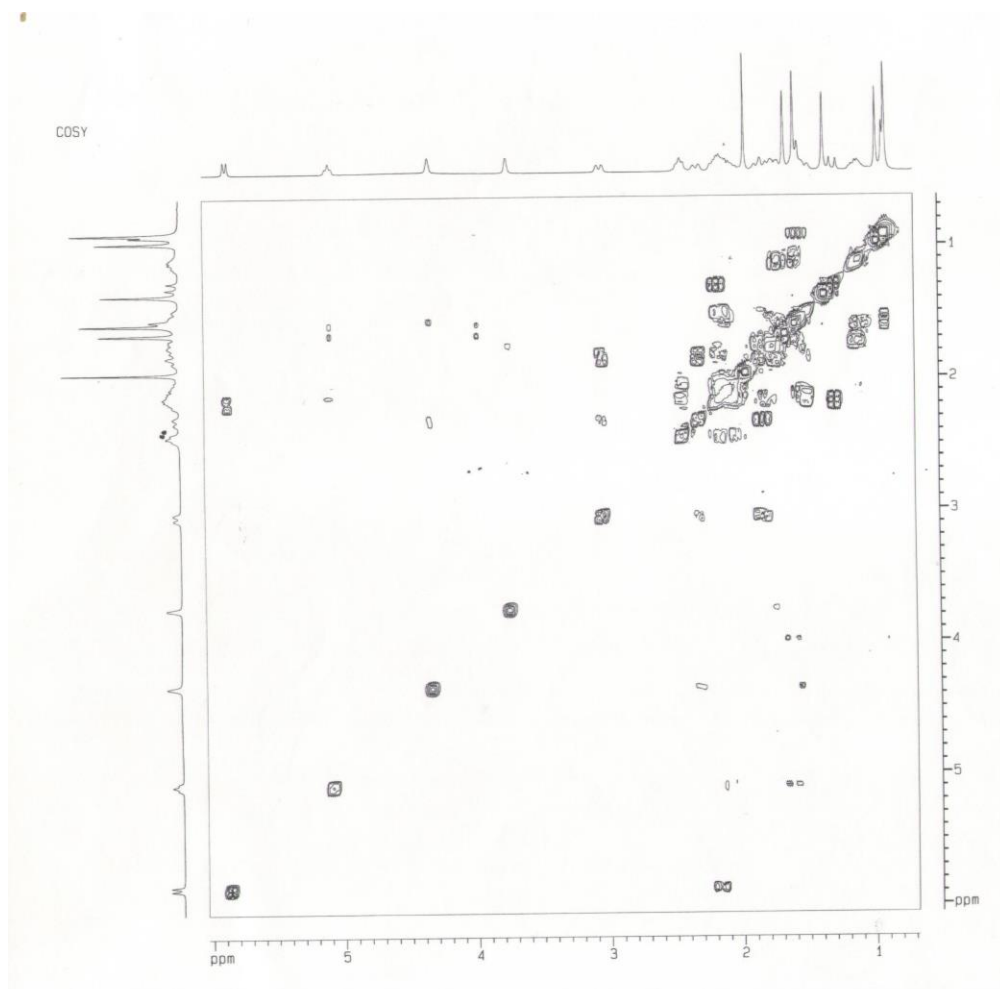

**Figure S4.**  $^1\text{H}$ - $^1\text{H}$  COSY spectrum of fusidic acid (**1**).

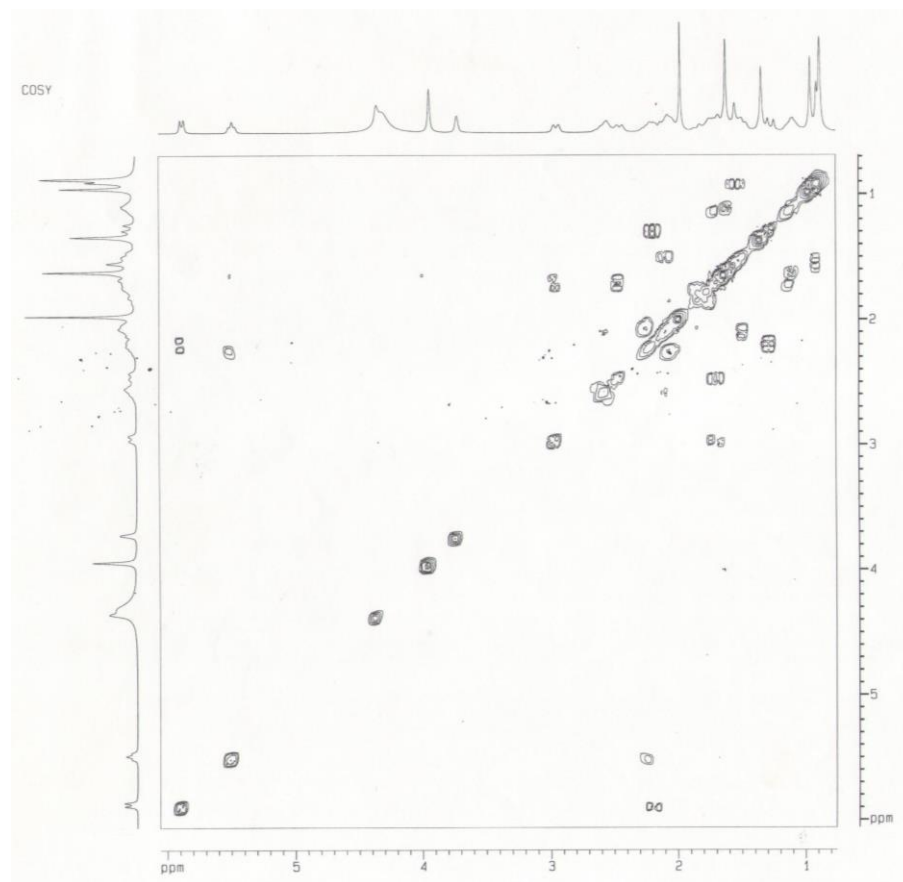

**Figure S5.** <sup>1</sup>H-<sup>1</sup>H COSY spectrum of (*24E*)-27-hydroxyfusidic acid (**2**).

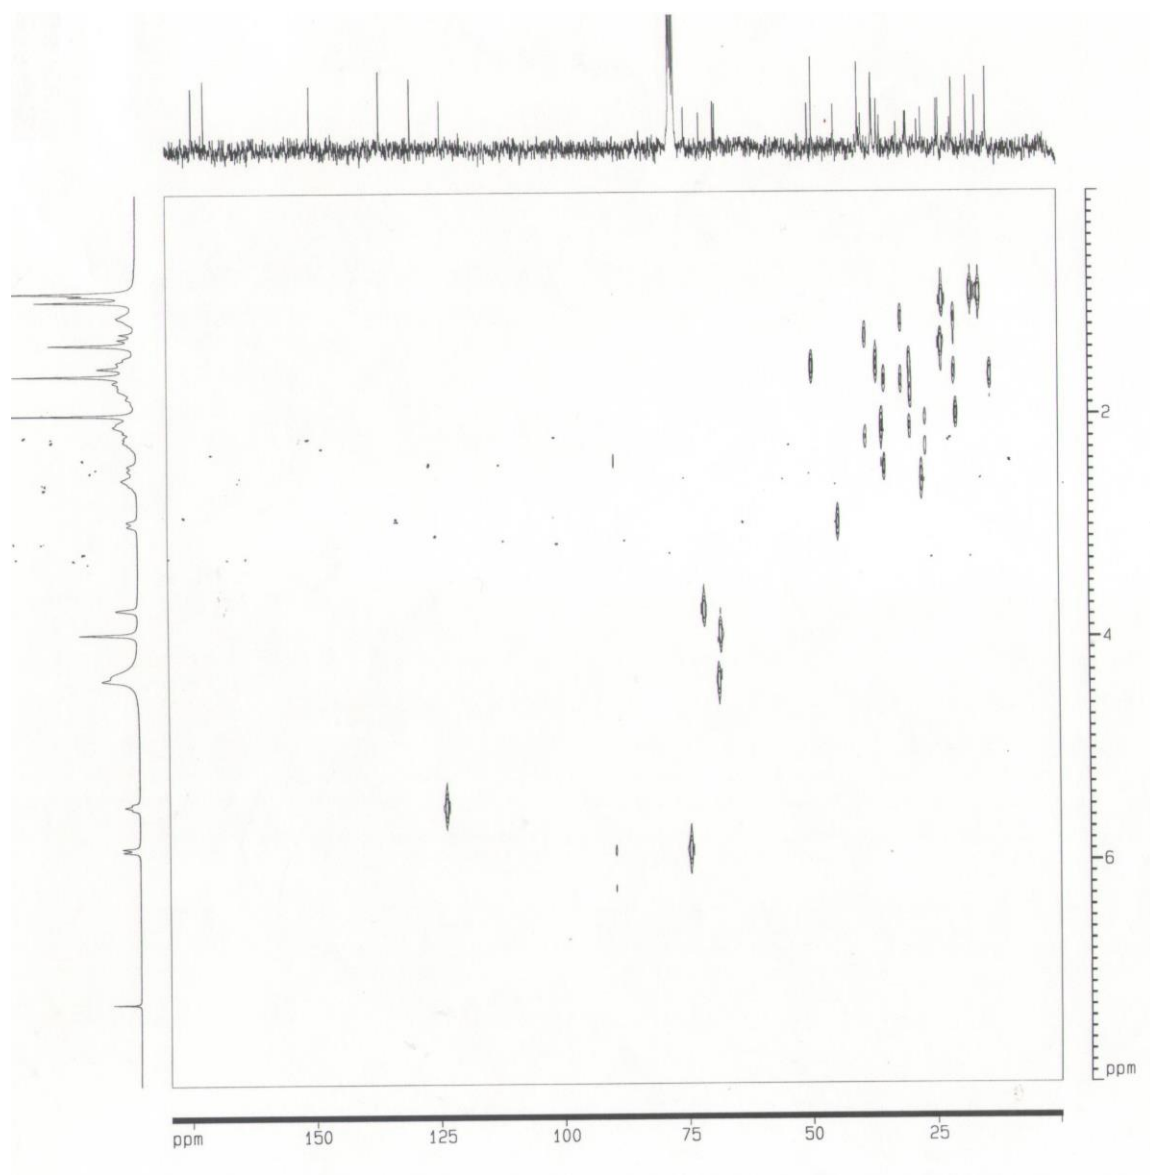

**Figure S6.** HSQC spectrum of (24*E*)- 27-hydroxyfusidic acid (**2**)



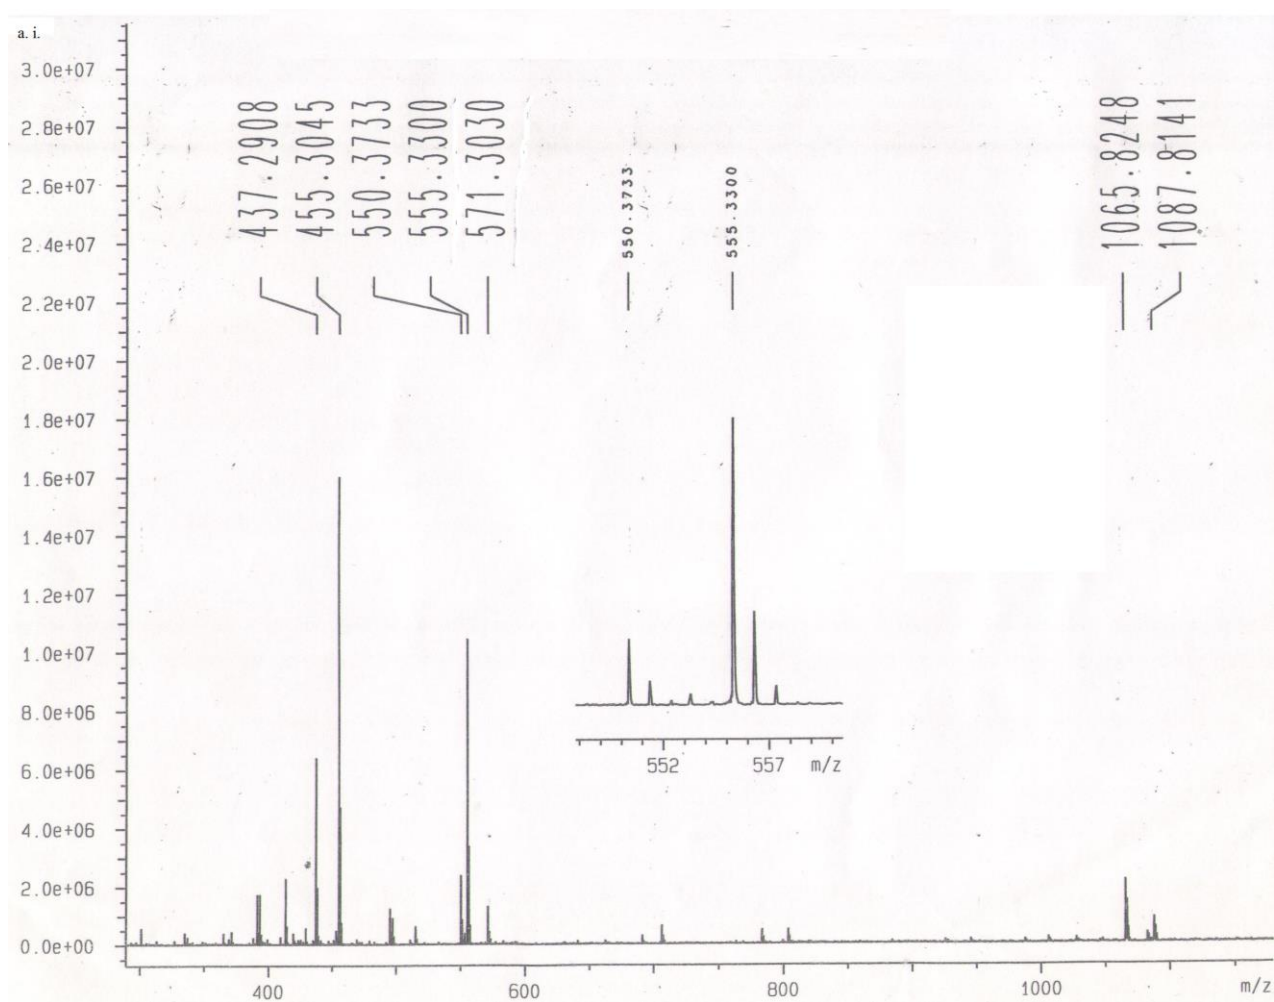

**Figure S7.** HRESI-MS spectrum of (24*E*)- 27-hydroxyfusidic acid (**2**)

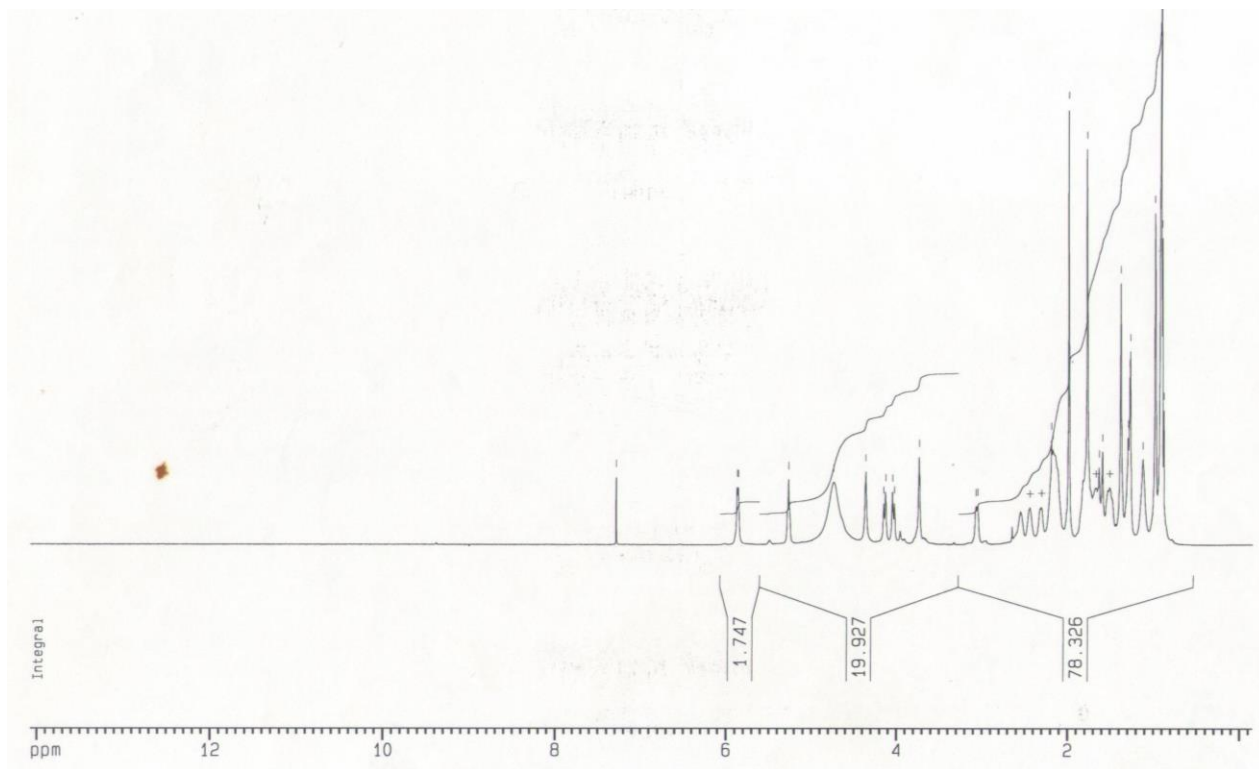

**Figure S8.**  $^1\text{H}$  NMR spectrum of (24Z)- 26-hydroxyfusidic acid (**3**), ( $\text{CDCl}_3$ , 500 MHz)

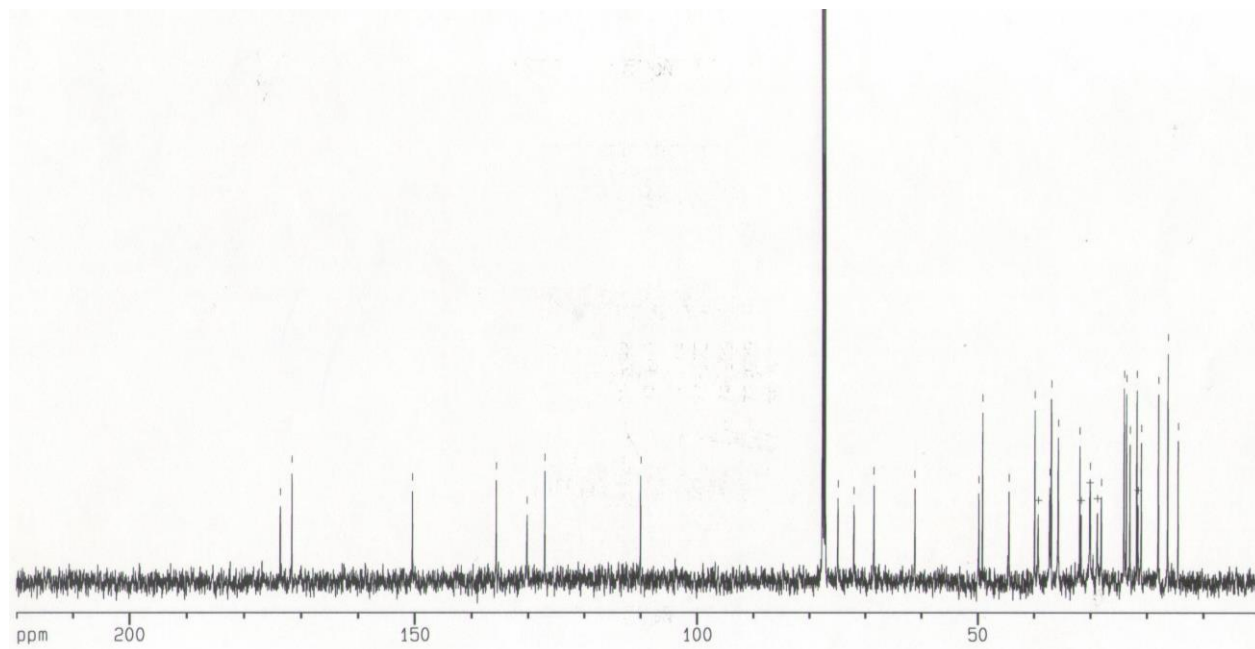

**Figure S9.**  $^{13}\text{C}$  NMR spectrum of (24Z)- 26-hydroxyfusidic acid (**3**), ( $\text{CDCl}_3$ , 125 MHz)

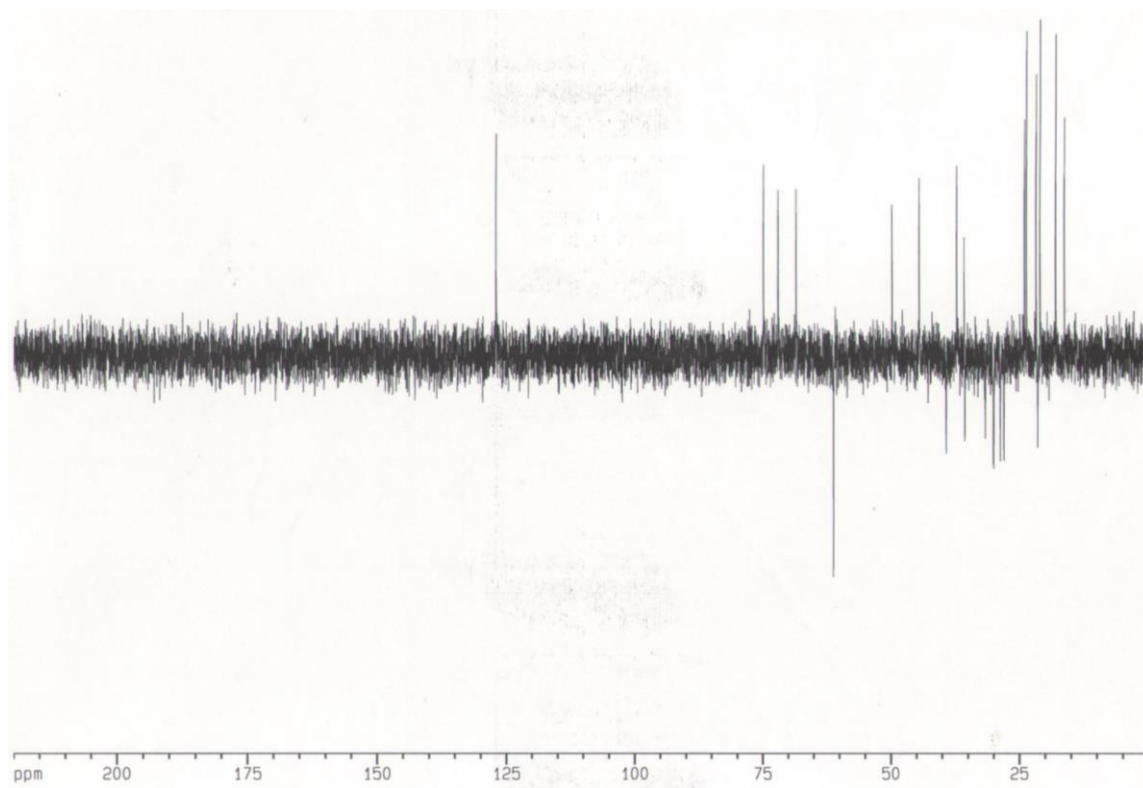

**Figure S10.** DEPT 135 spectrum of (24Z)- 26-hydroxyfusidic acid (**3**).

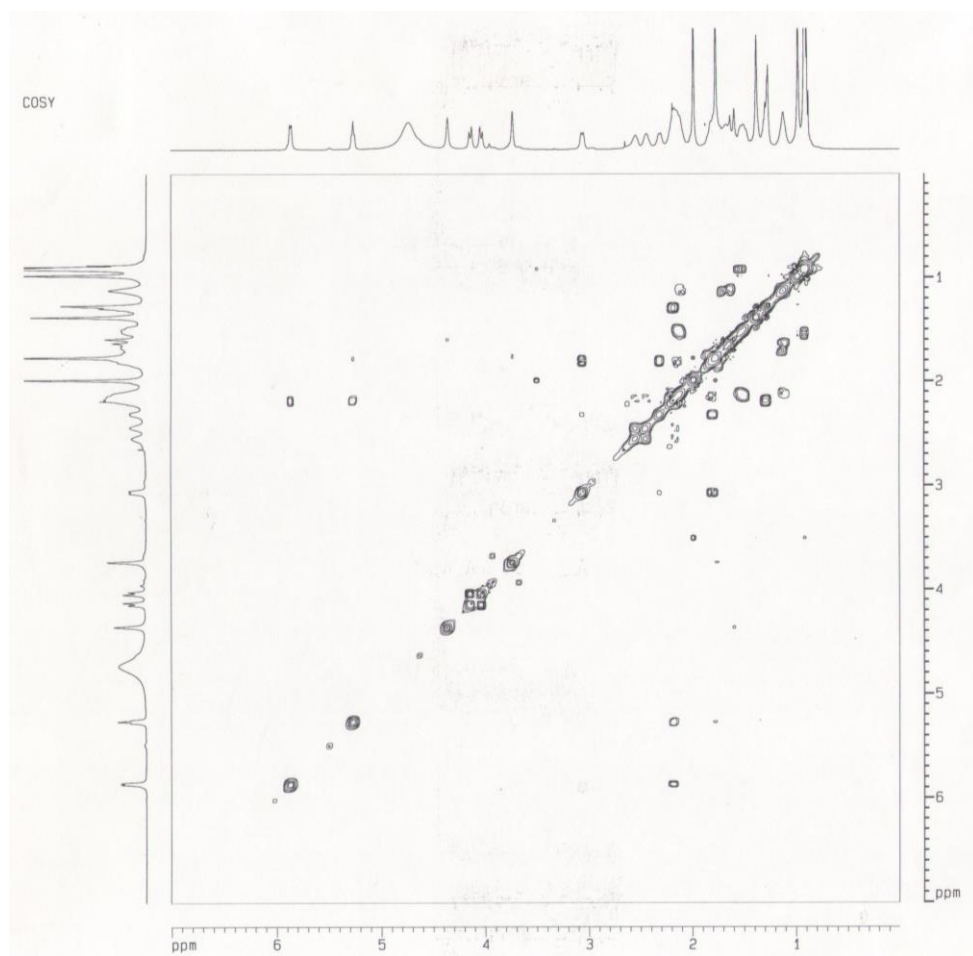

**Figure S11.** <sup>1</sup>H-<sup>1</sup>H COSY spectrum of (24Z)- 26-hydroxyfusidic acid (**3**).

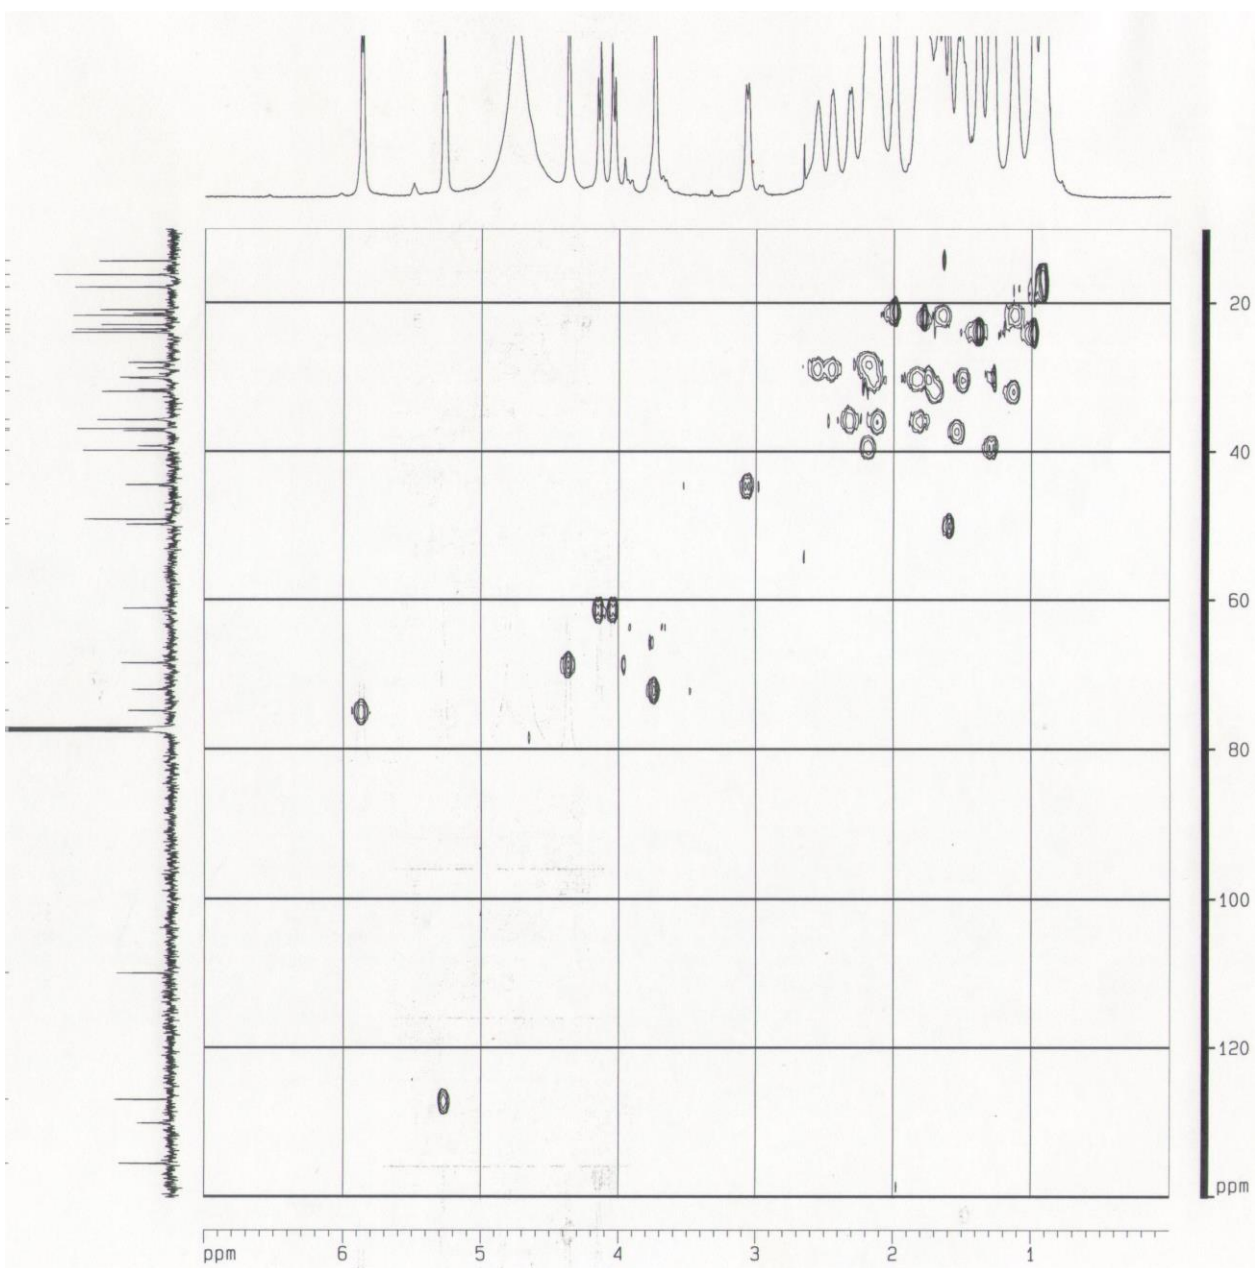

**Figure S12.** Gradient HMQC spectrum of (24Z)- 26-hydroxyfusidic acid (**3**)

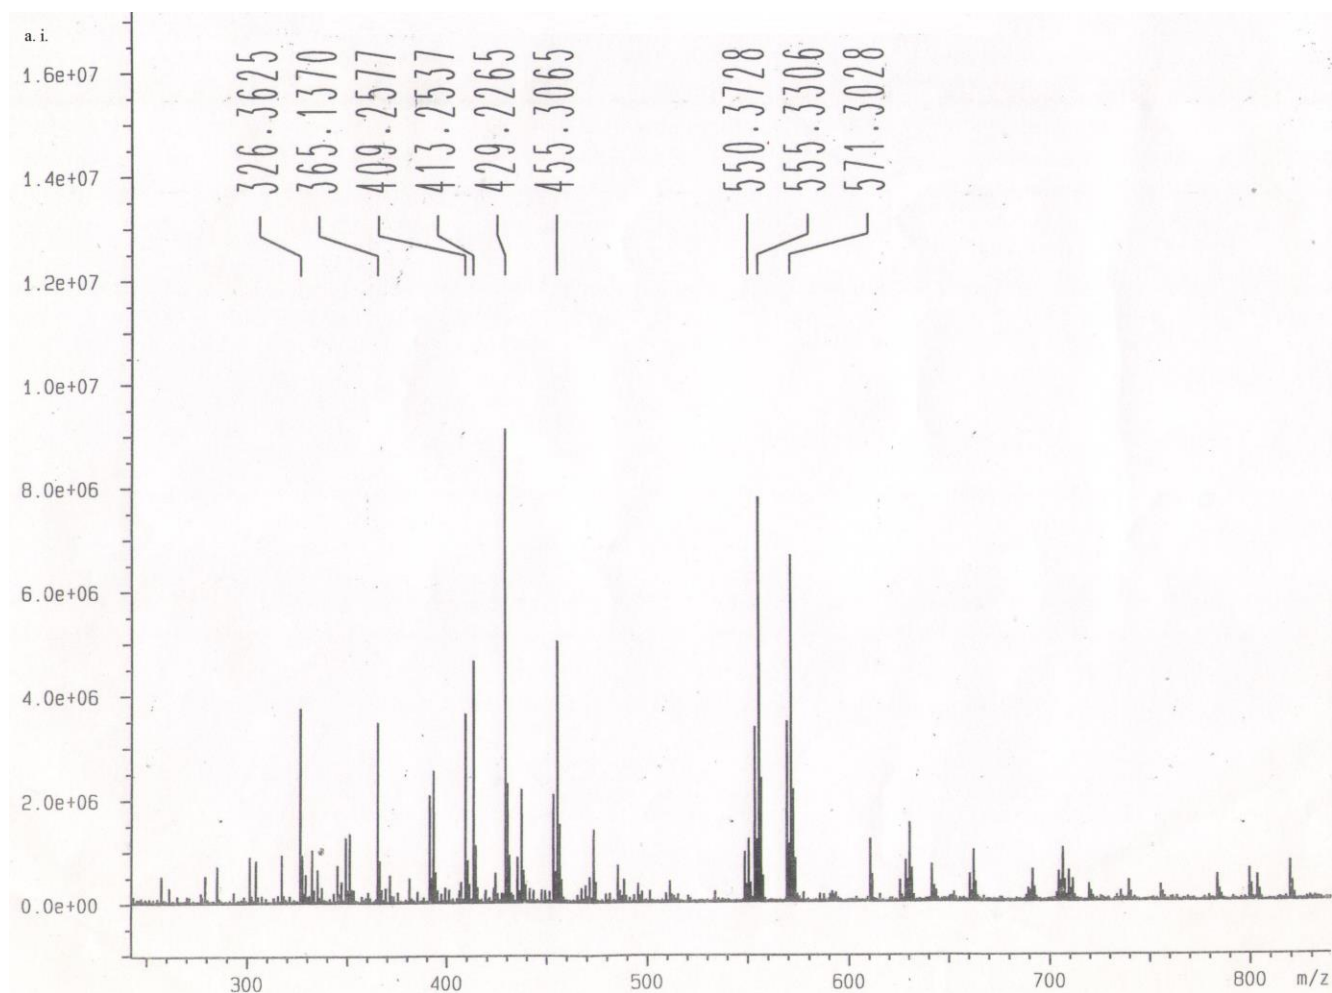

**Figure S13.** HRESI-MS spectrum of (24Z)- 26-hydroxyfusidic acid (**3**)

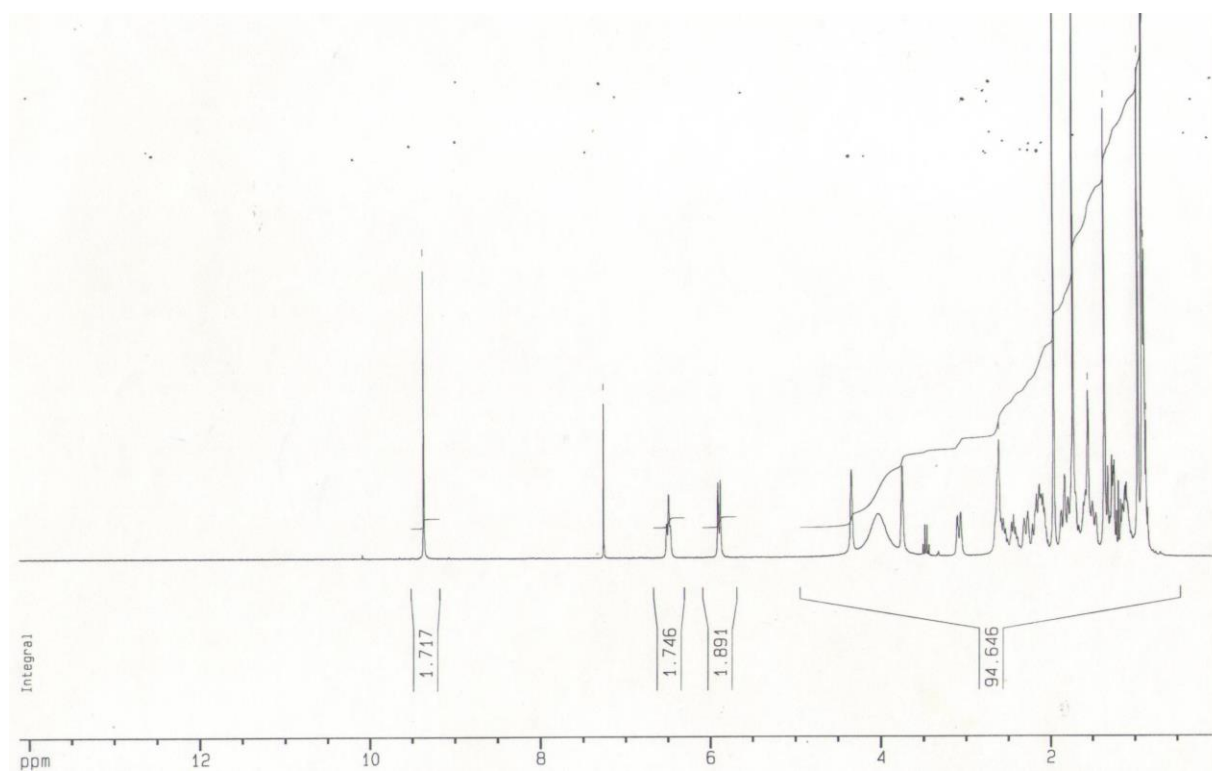

**Figure S14.**  $^1\text{H}$  NMR spectrum of 26-formylfusidic acid (**4**), ( $\text{CDCl}_3$ , 300 MHz)

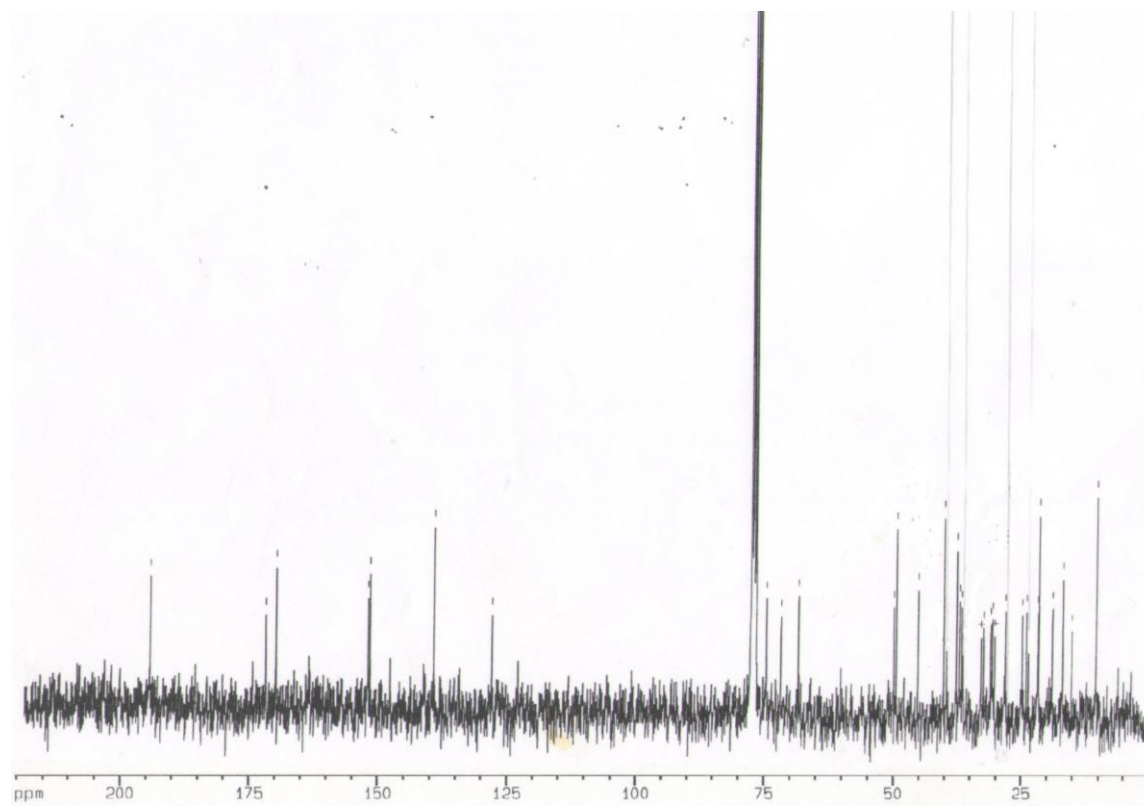

**Figure S15.**  $^{13}\text{C}$  NMR spectrum of 26-formylfusidic acid (**4**), ( $\text{CDCl}_3$ , 75 MHz)

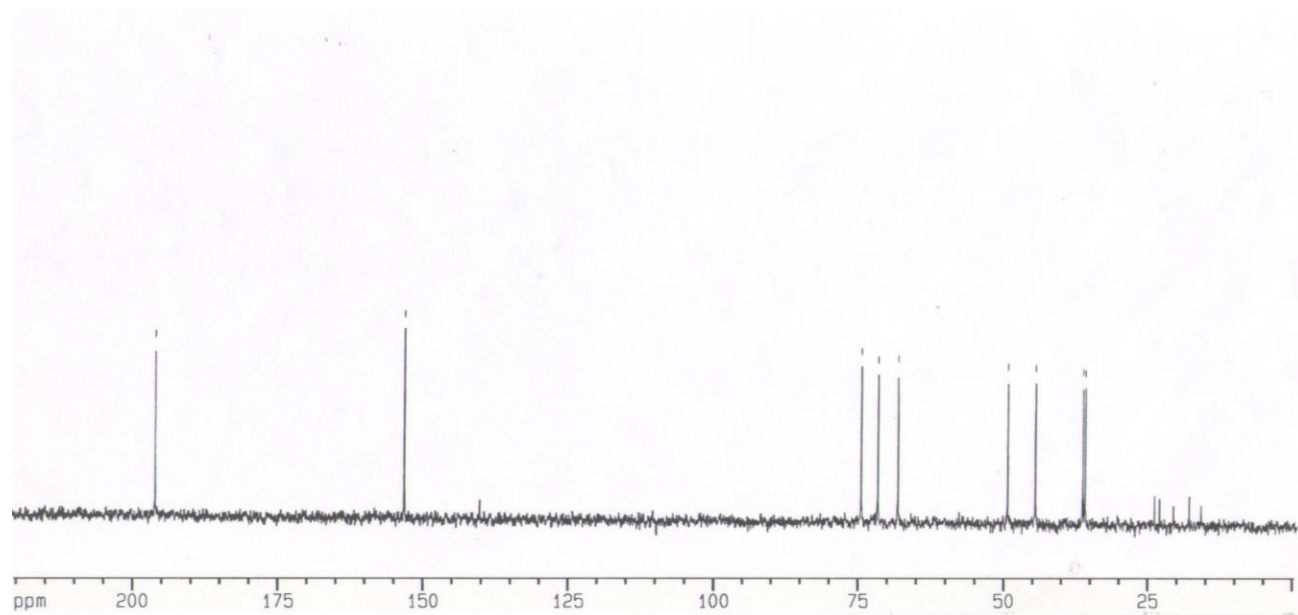

**Figure S14.** DEPT 90 spectrum of 26-formylfusidic acid (**4**)



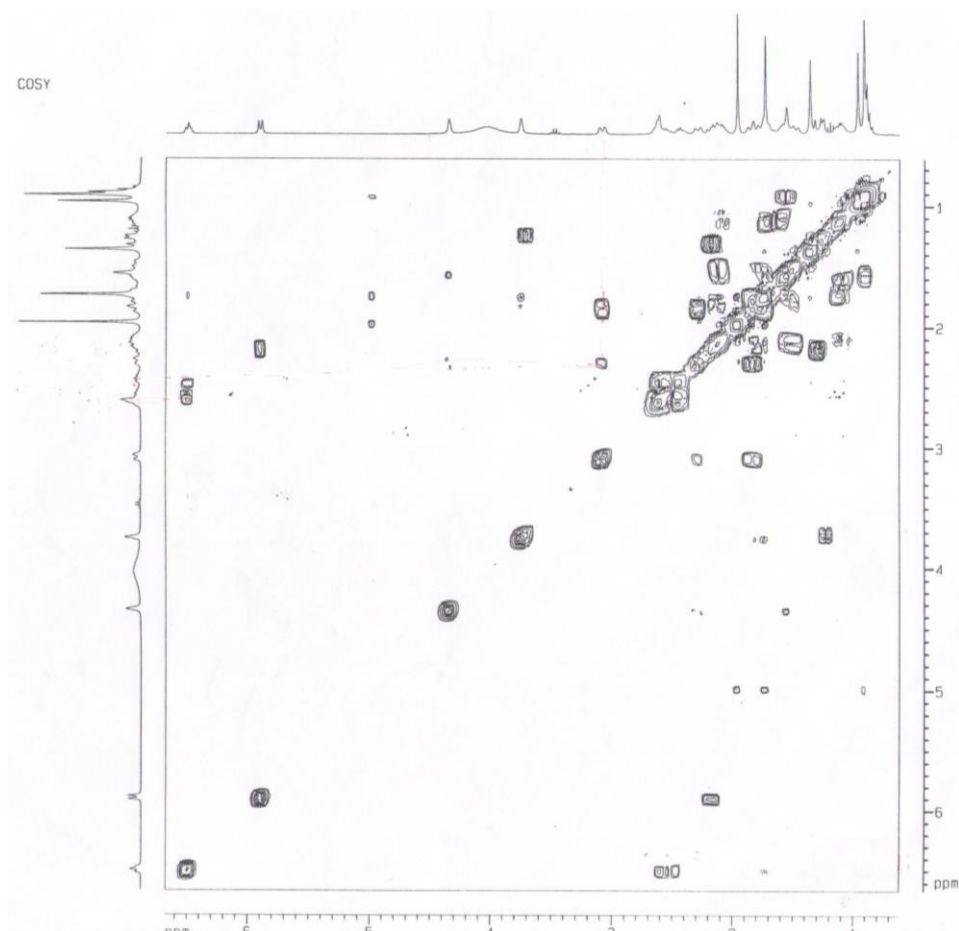

**Figure S17.**  $^1\text{H}$ - $^1\text{H}$  COSY spectrum of 26-formylfusidic acid (**4**)

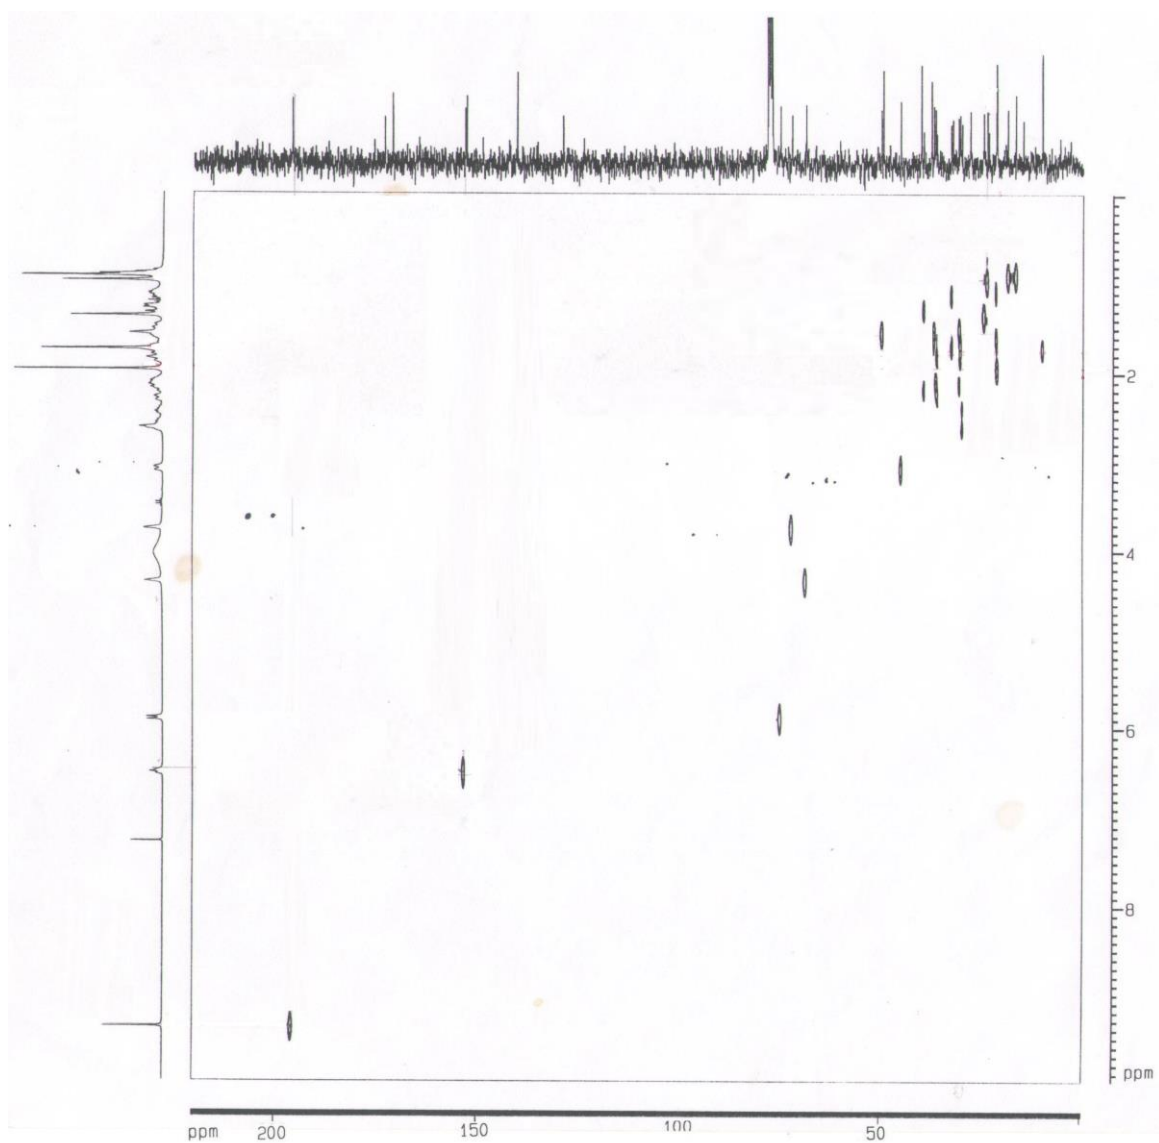

**Figure S18.** HSQC spectrum of 26-formylfusidic acid (**4**)

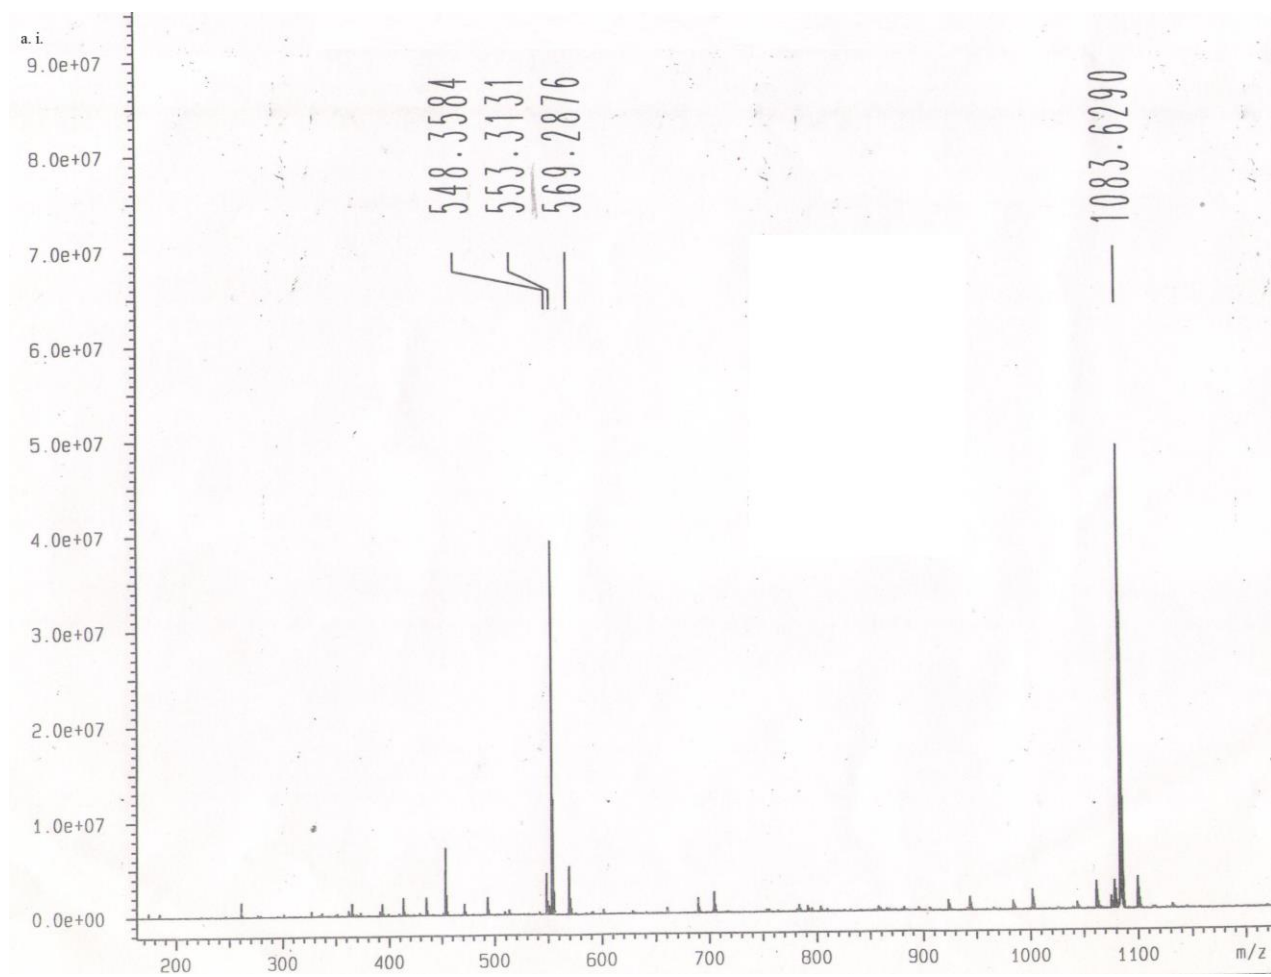

**Figure S19.** HRESI-MS spectrum of 26-formylfusidic acid (**4**)

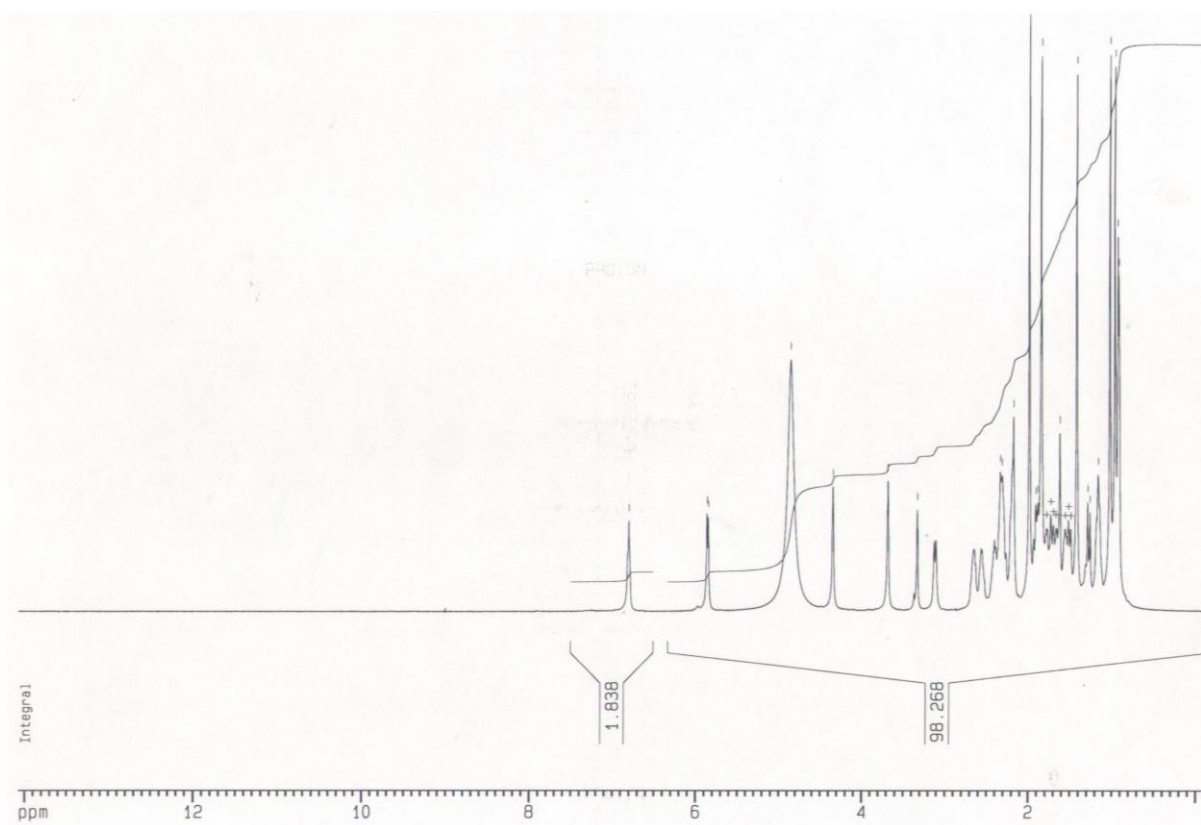

**Figure S20.** <sup>1</sup>H NMR spectrum of 26-carboxyfusidic acid (**5**), (methanol-*d*<sub>4</sub>, 500 MHz)

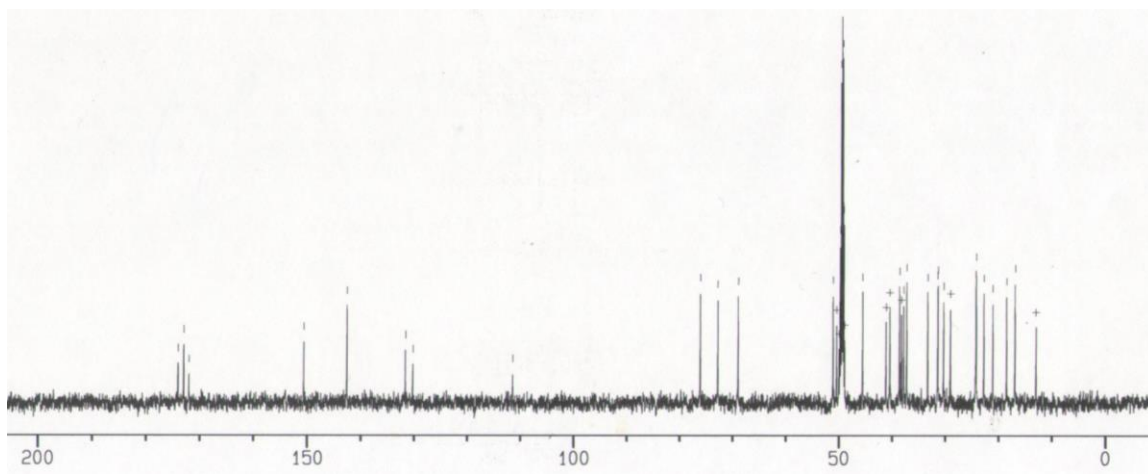

**Figure S21.** <sup>13</sup>C NMR spectrum of 26-carboxyfusidic acid (**5**), (methanol-*d*<sub>4</sub>, 125 MHz)

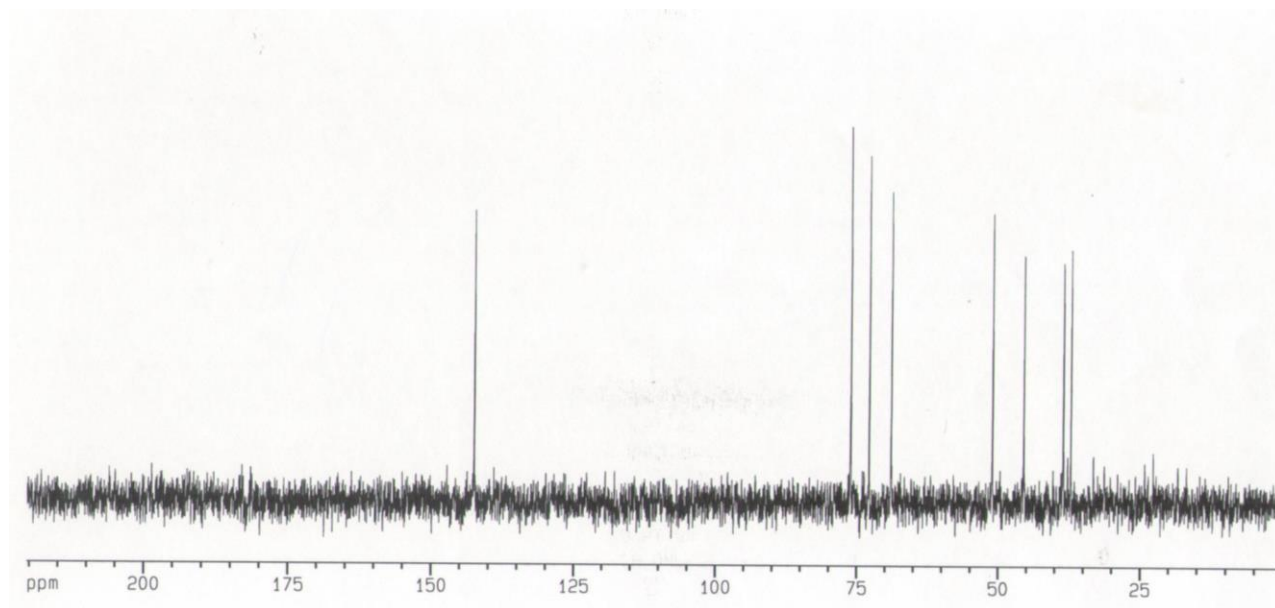

**Figure S22.** DEPT 90 spectrum of 26-carboxyfusic acid (**5**)

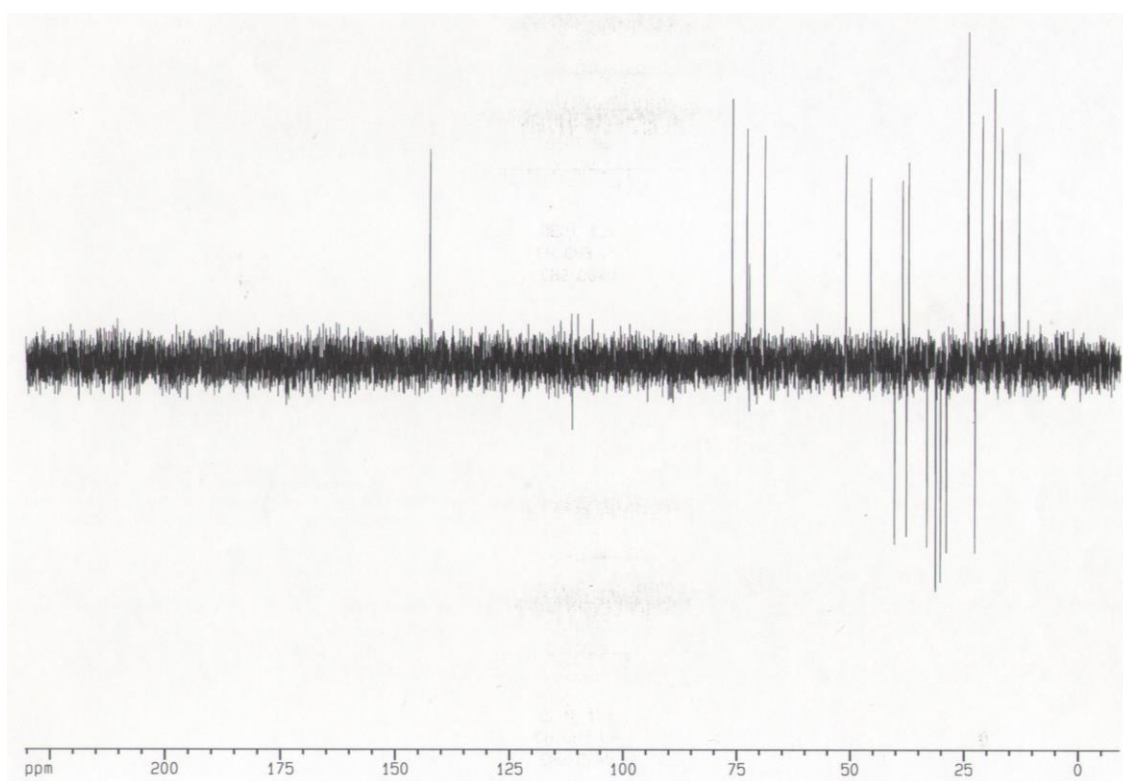

**Figure S23.** DEPT 135 spectrum of 26-carboxyfusic acid (**5**).

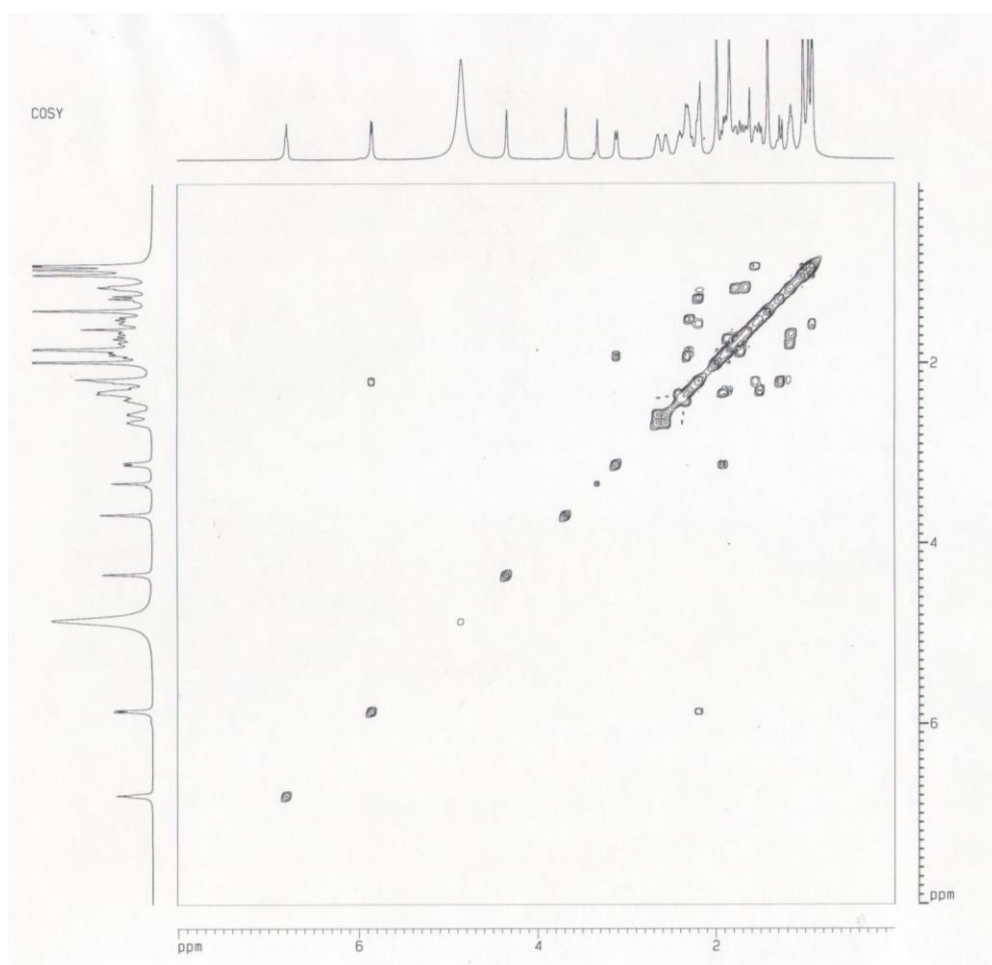

**Figure S24.** <sup>1</sup>H-<sup>1</sup>H COSY spectrum of 26-carboxyfusic acid (**5**).

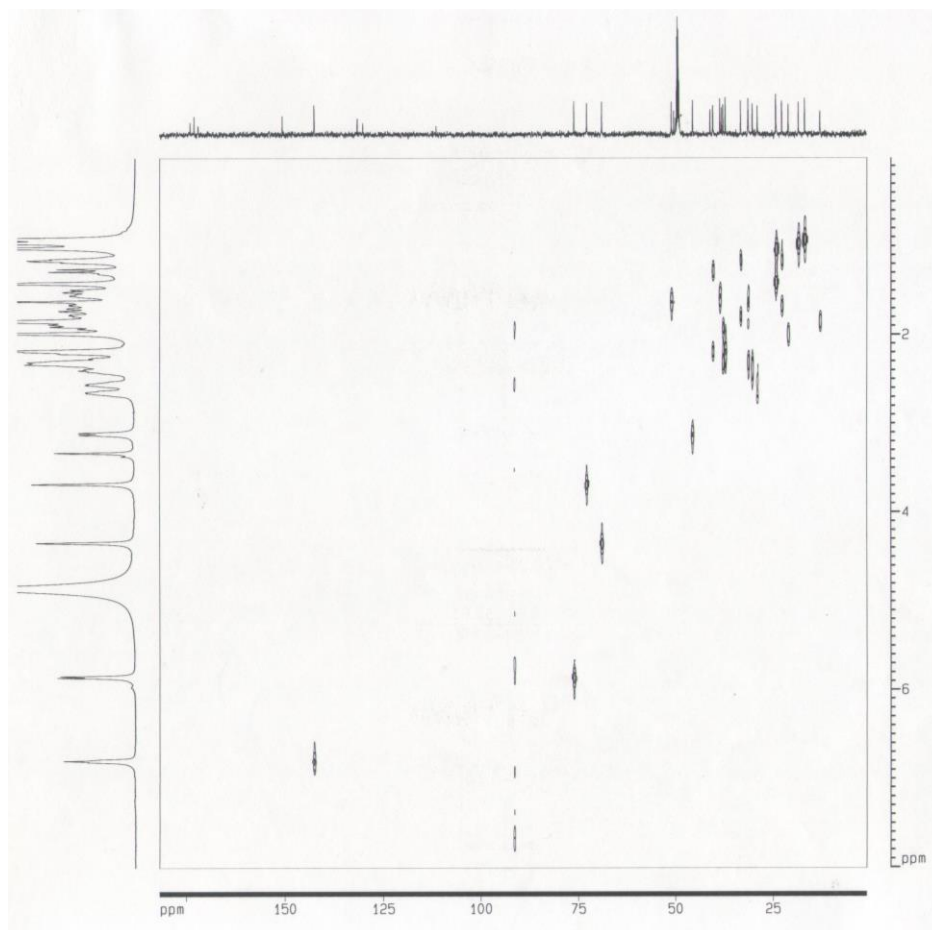

**Figure S25.** HSQC spectrum of 26-carboxyfusic acid (**5**)

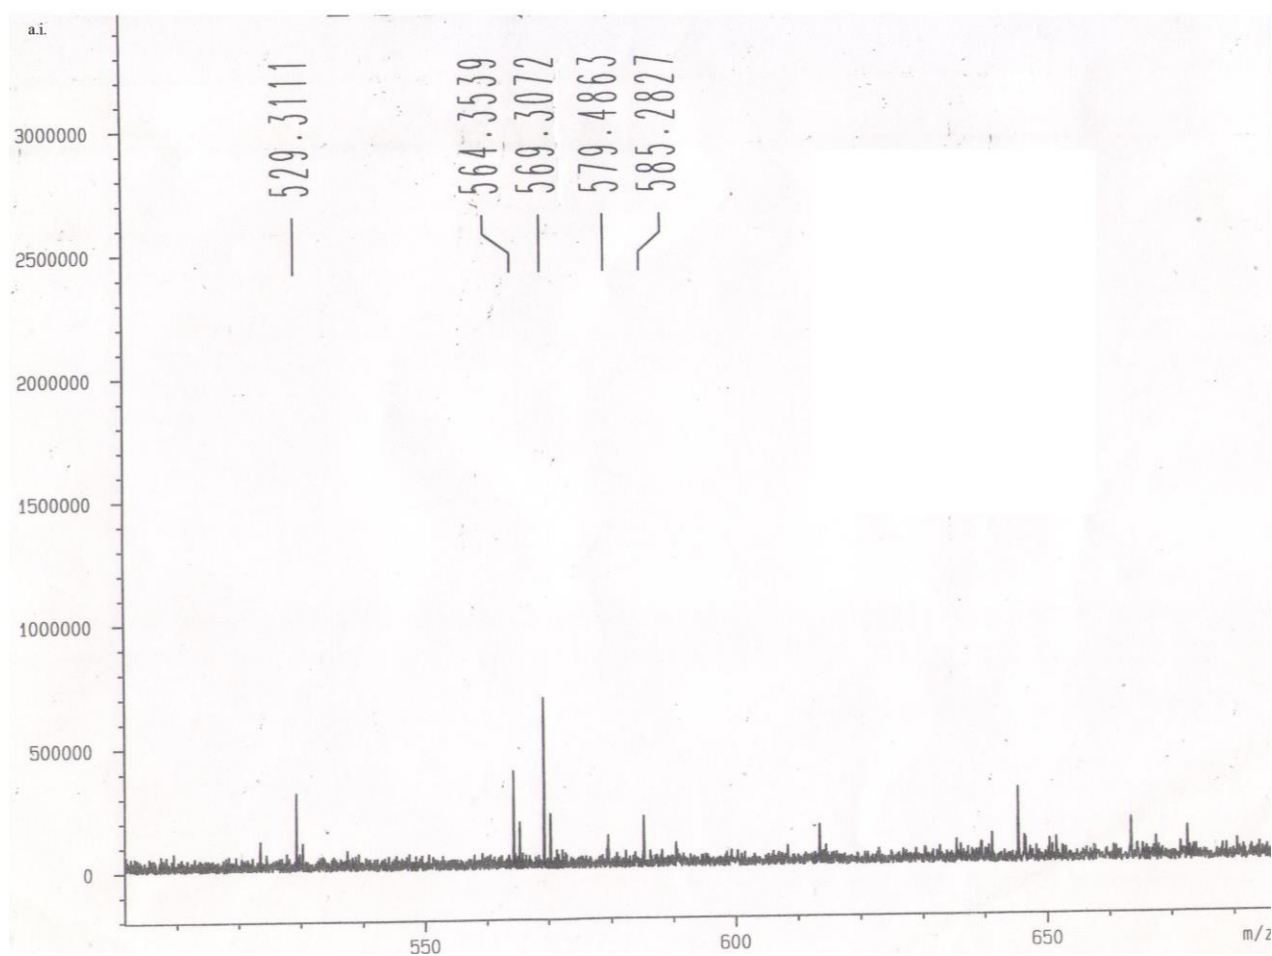

**Figure S26.** HRESI-MS spectrum of 26-carboxyfusidic acid (**5**)



## A list of screened strains:

- 1- *Aspergillus alliaceous* NRRL 315
- 2- *Aspergillus flavipes* ATCC 11013
- 3- *Aspergillus niger* NRRL 599
- 4- *Aspergillus niger* NRRL 2295
- 5- *Aspergillus niger* ATCC 10549
- 6- *Aspergillus ochraceous* NRRL 398
- 7- *Aspergillus ochraceous* NRRL 405
- 8- *Candida albicans* (lab isolate)
- 9- *Cunninghamella bainari* UI 3605
- 10- *Cunninghamella blackesleeana* 8688a
- 11- *Cunninghamella blackesleeana* MR 398
- 12- *Cunninghamella echinulata* NRRL 1382
- 13- *Cunninghamella elegans* NRRL 1392
- 14- *Gymnascella citrina* NRRL 6050
- 15- *Lindera pinnespora* NRRL 2237
- 16- *Penicillium chrysogenum* ATCC 10002
- 17- *Penicillium chrysogenum* ATCC 10002-K
- 18- *Penicillium chrysogenum* ATCC 9480
- 19- *Penicillium purpureus* UI 193
- 20- *Penicillium vermiculatum* NRRL 1009
- 21- *Rhizopus nigricans* NRRL 1477
- 22- *Rhizopus species* 36060
- 23- *Rhodotorula rubra* NRRL 1592
- 24- *Saccharomyces cerevisiae* (Baker's yeast)
- 25- *Streptomyces fulvissimus* NRRL 1453B
